# Supplementary material for: Selective labeling of tyrosine residues in proteins: insights from PTAD labeling and tandem mass spectrometry analysis
Source: Royal Society of Chemistry journal article supplement (doi:10.1039/d4mo00186a), 2024-12-02
Supplement: d4mo00186a1.pdf [file d4mo00186a1.pdf]

## SUPPORTING INFORMATION

### Selective Labeling of Tyrosine Residues in Proteins: Insights from PTAD Labeling and Tandem Mass Spectrometry Analysis

**Adway O. Zacharias<sup>1,2</sup>, Sharel Cornelius<sup>1</sup>, Saiful M. Chowdhury<sup>1\*</sup>**

1. Department of Chemistry and Biochemistry, University of Texas at Arlington, Arlington, TX 76019
2. Current address: DuPont Specialty Chemicals, LLC, Marlborough, MA 01752

**Corresponding Author**

**Saiful M Chowdhury, PhD**

Associate Professor

Chemistry and Biochemistry

University of Texas at Arlington

Box 19065

700 Planetarium Place, Room 130

Arlington, TX 76019

Tel: 509-392-2203

[schowd@uta.edu](mailto:schowd@uta.edu)

<http://www.uta.edu/chemistry/faculty/directory/Chowdhury.php>

<https://proteomics-lab.uta.edu/>

| <b>Table of Contents</b>                                                                  | <b>Page No.</b> |
|-------------------------------------------------------------------------------------------|-----------------|
| 1. Synthesis scheme of PTAD                                                               | S2              |
| 2. Neurotensin                                                                            | S3              |
| 3. HA peptide PTAD labelling                                                              | S4              |
| 4. BSA peptide (Y179)                                                                     | S5              |
| 5. PTAD tagged HeLa cell lysate                                                           | S5              |
| 6. Table 1: List of PTAD-labeled high-confidence proteins obtained from HeLa cell lysate. | S6-<br>S8       |
| 7. Table 2: List of PTAD-labeled peptides observed in different proteins.                 | S8              |

## Scheme S1.

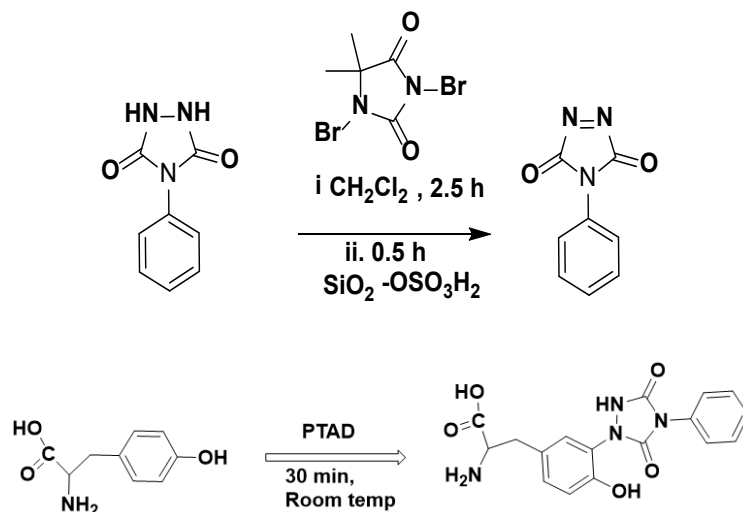

Synthesis scheme of PTAD (top) and PTAD labeling in a Tyrosine residue (bottom).

### Synthesis of 4-phenyl-1,2,4-triazoline-3,5-dione (PTAD)

PTAD was synthesized following a procedure available in literature. Briefly, a solution of 4-phenyl-1,2,4-triazolidine-3,5-dione (20mg, 0.11 mmol) in dichloromethane (5mL) was prepared. 1,3-dibromo-5,5-dimethylhydantoin (32 mg, 0.11 mmol) was added and the resulting solution was stirred for two hours. Then silica sulfonic acid ( $\text{SiO}_2\text{-OSO}_3\text{H}_2$ ) (88mg, 0.55 mmol) was added and stirred at room temperature for thirty minutes. Silica sulfonic acid was removed by centrifugation and the volatile material was evaporated *in vacuo* to give the product as a red solid.  $^1\text{H}$  NMR ( $(\text{CD}_3)_2\text{SO}$ ):  $\delta$  (ppm) 7.51-7.56 (2H, d), 7.36-7.48 (3H,m).

# Neurotensin:

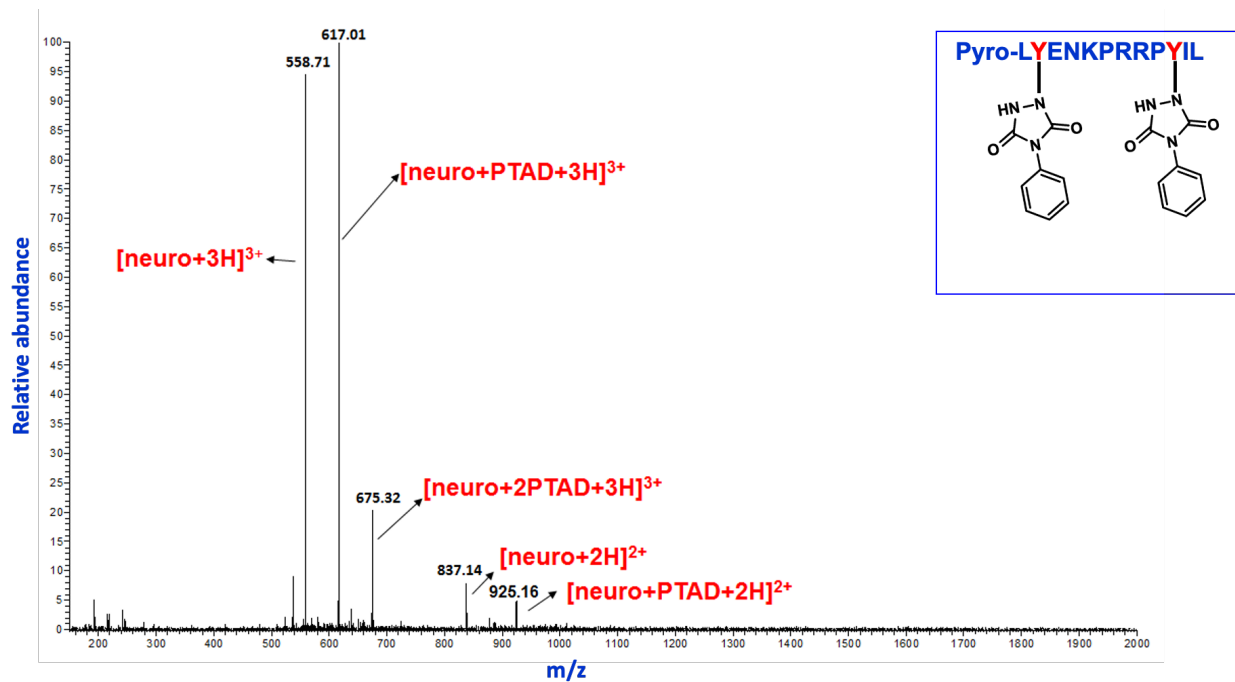

Figure S1: Full-MS spectrum of PTAD labeled neurotensin.

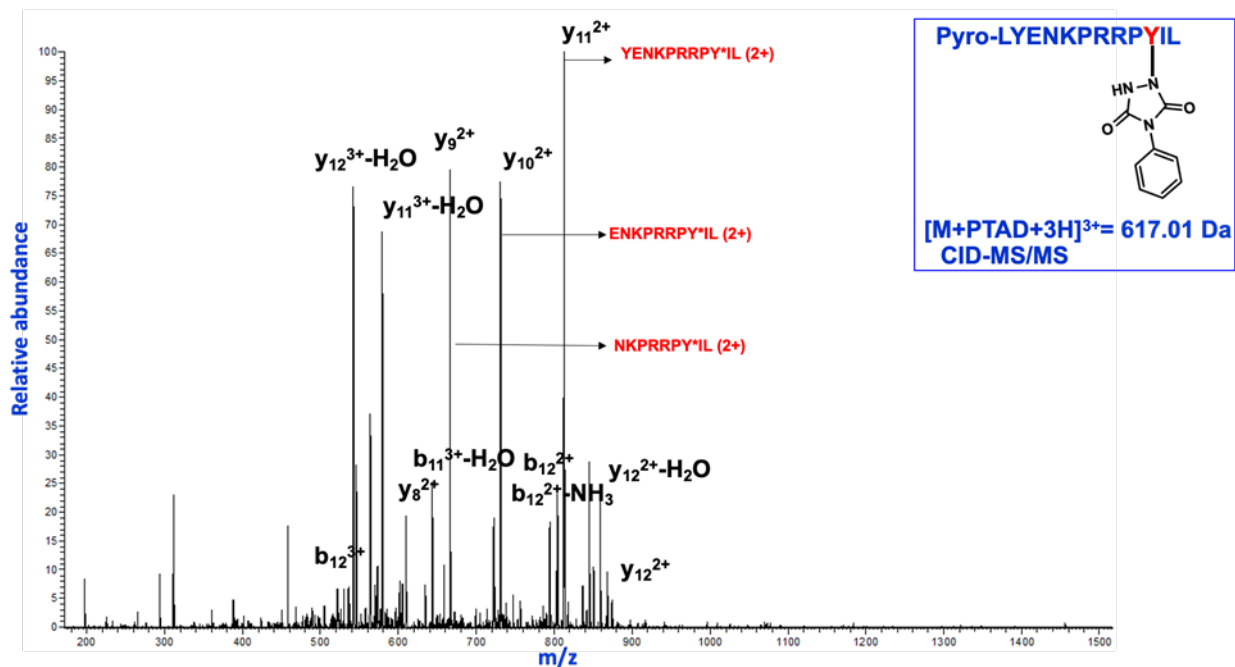

Figure S2: CID-MS/MS of a singly tagged neurotensin precursor m/z 617.07 Da (3+).

# HA Peptide:

S3 A)

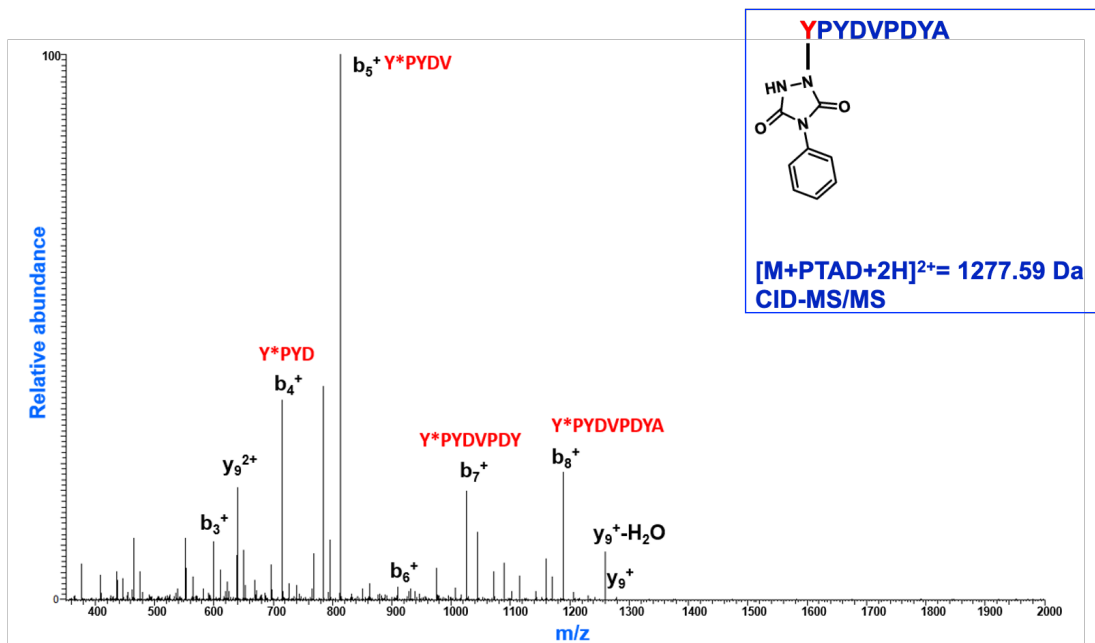

S3 B)

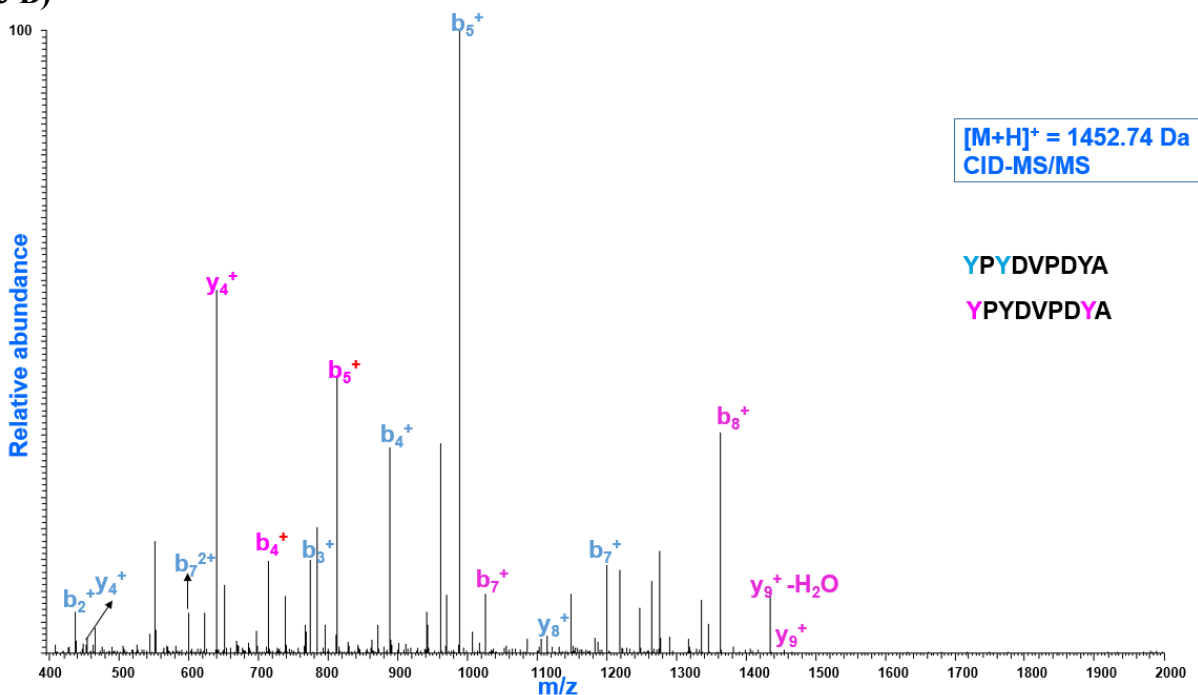

**Figure S3:** A) CID-MS/MS of m/z 1277.59 Da PTAD labeled HA peptide with one PTAD-tagged tyrosine residue. B) CID-MS/MS of m/z 1452.73 Da PTAD labeled HA peptide, two types of double labeled HA peptide are observed. MS/MS of the mixtures of the same m/z precursors produced mixtures of b/y ions.

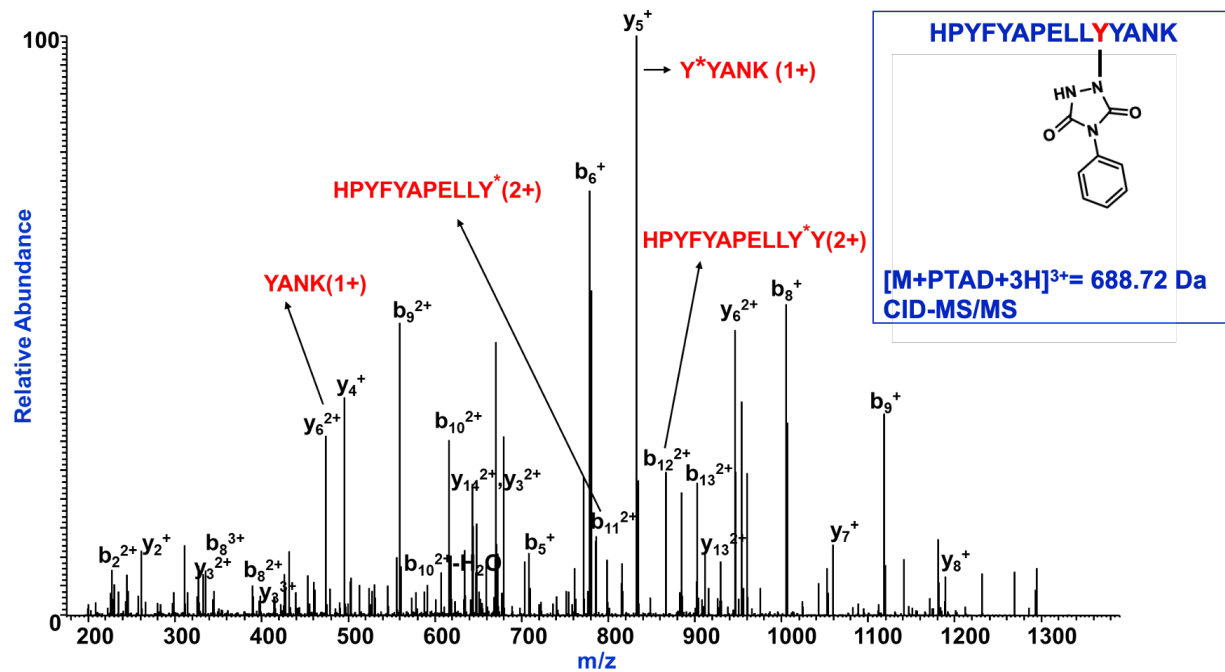

**Figure S4:** PTAD-tagged BSA peptide (Y179).

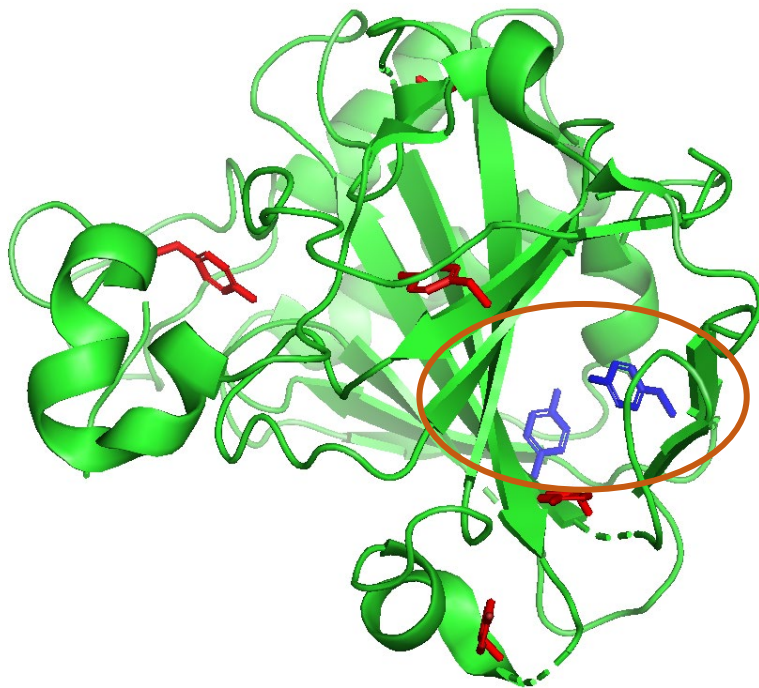

**Figure S5:** PTAD-tagged Carbonic Anhydrase (pdb 1G67). Blue-labeled sites, Red-Unlabeled sites.

## HELA Cell lysate

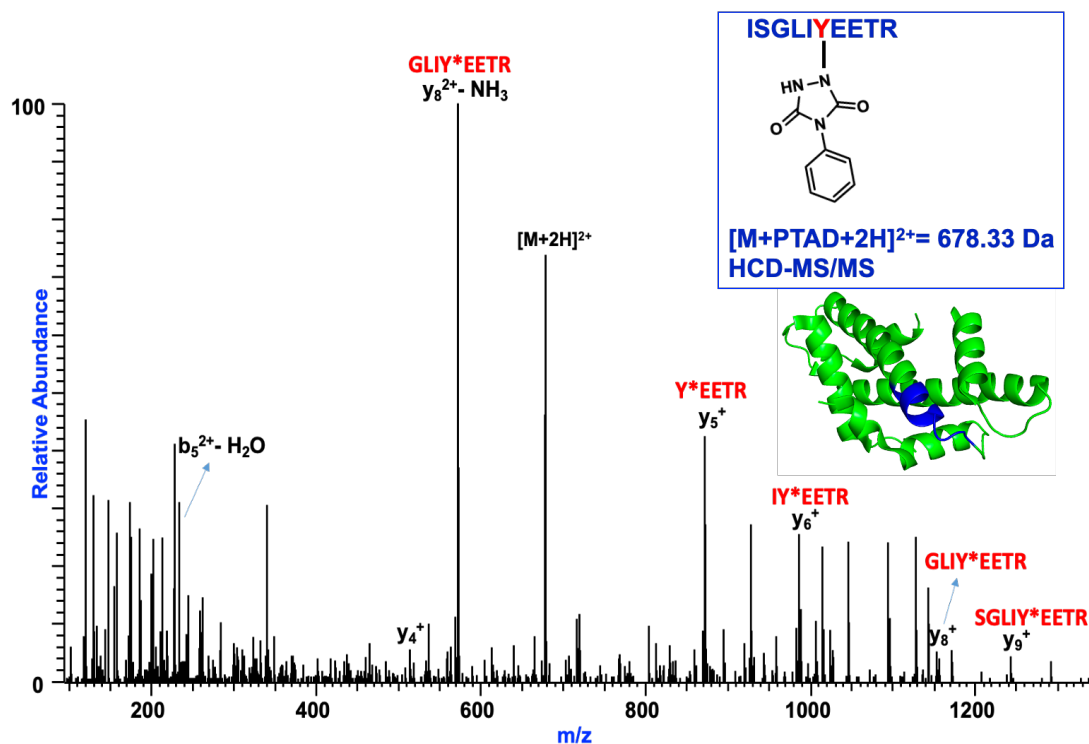

**Figure S6** An HCD-MS/MS spectrum of m/z 678.33 Da (2+) of PTAD-tagged Histone H-4 protein from HeLa cell lysate. Location of the PTAD-tagged site is shown in the crystal structure (3nqj)

**Table 1:** List of PTAD-labeled high-confidence proteins obtained from HeLa cell lysate. The labeled peptide sequences have been listed with their associated protein names, accession numbers, XCorr values, and unique peptides.

| Protein name                              | Annotated Sequence              | Modifications                                | # Proteins | Master Protein Accessions | XCorr         | Unique peptides |
|-------------------------------------------|---------------------------------|----------------------------------------------|------------|---------------------------|---------------|-----------------|
| Histone H1.3                              | ALAAAGyDVEK                     | Y7(PTAD)                                     | 5          | ENST00000244534           | 2.53          | 4               |
| Protein disulfide-isomerase A3            | DGEEAGyDGPR;<br>mDATANDVPSPyEVR | [Y8(PTAD)];<br>[M1(Oxidation);<br>Y12(PTAD)] | 1          | ENST00000300289           | 2.47;<br>3.39 | 14              |
| Heterogenous nuclear ribonucleoprotein H3 | DGmDNQGGyGSVGR                  | M3(Oxidation);<br>Y9(PTAD)                   | 2          | ENST00000265866           | 1.94          | 5               |

|                                                   |                                               |                                                                               |   |                 |                        |    |
|---------------------------------------------------|-----------------------------------------------|-------------------------------------------------------------------------------|---|-----------------|------------------------|----|
| <b>Heat shock protein HSP 90-alpha</b>            | DNSTmGymAAK;<br>NPDDITNEEyGEFYK;<br>yIDQEELNK | [M5(Oxidation),<br>Y7(PTAD),<br>M8(Oxidation)];<br>[Y10(PTAD)];[Y<br>1(PTAD)] | 2 | ENST00000334701 | 2.27;<br>2.79;<br>2.14 | 9  |
| <b>14-3-3 protein epsilon</b>                     | EAAENSLVAyK                                   | Y10(PTAD)                                                                     | 2 | ENST00000264335 | 2.77                   | 5  |
| <b>Small ribosomal subunit protein uS3</b>        | ELAEDGySGVEVR                                 | Y7(PTAD)                                                                      | 3 | ENST00000278572 | 2.36                   | 6  |
| <b>Transgelin-2</b>                               | GASQAGmTGyGmPR                                | M7(Oxidation);<br>Y10(PTAD);<br>M12(Oxidation)                                | 3 | ENST00000368096 | 2.61                   | 4  |
| <b>Heat shock 70 kDa protein 1A</b>               | IINEPTAAAIyGLDR                               | Y12(PTAD)                                                                     | 3 | ENST00000400040 | 3.18                   | 15 |
| <b>Histone H4</b>                                 | ISGLIyEETR                                    | Y6(PTAD)                                                                      | 1 | ENST00000340756 | 2.25                   | 5  |
| <b>Tubulin beta chain</b>                         | ISVYyNEATGGK                                  | Y5(PTAD)                                                                      | 1 | ENST00000383564 | 2.41                   | 5  |
| <b>Endoplasmic reticulum chaperone BiP</b>        | ITPSyVAFTPEGER                                | Y5(PTAD)                                                                      | 1 | ENST00000324460 | 3.05                   | 23 |
| <b>14-3-3 protein beta/alpha</b>                  | LAEQAERyDDmAAA<br>mK                          | Y8(PTAD);<br>M11(Oxidation);<br>M15(Oxidation)                                | 3 | ENST00000353703 | 2.55                   | 3  |
| <b>Large ribosomal subunit protein uL23</b>       | LAPDyDALDVANK                                 | Y5(PTAD)                                                                      | 1 | ENST00000422514 | 2.65                   | 3  |
| <b>Protein disulfide-isomerase A3</b>             | LAPEyEAAATR                                   | Y5(PTAD)                                                                      | 1 | ENST00000300289 | 2.01                   | 14 |
| <b>Transferrin receptor protein 1</b>             | LLNENSyVPR                                    | Y7(PTAD)                                                                      | 1 | ENST00000360110 | 2.11                   | 8  |
| <b>Heterogeneous nuclear ribonucleoprotein A1</b> | NQGGYGGSSSSSSy<br>GSGR                        | Y14(PTAD)                                                                     | 3 | ENST00000340913 | 3.1                    | 9  |
| <b>Annexin A2</b>                                 | RAEDGSVIDyELIDQD<br>AR; TPAQyDASELK           | Y10(PTAD);<br>Y5(PTAD)                                                        | 2 | ENST00000332680 | 3.32;<br>3.14          | 18 |
| <b>Vimentin</b>                                   | SLyASSPGGVYATR                                | Y3(PTAD)                                                                      | 1 | ENST00000224237 | 2                      | 27 |
| <b>Nascent polypeptide-associated complex</b>     | SPASDTyIVFGEAK                                | Y7(PTAD)                                                                      | 1 | ENST00000393891 | 2.17                   | 4  |



|                                                   |                         |           |    |                 |      |    |
|---------------------------------------------------|-------------------------|-----------|----|-----------------|------|----|
| <b>subunit alpha</b>                              |                         |           |    |                 |      |    |
| <b>Heterogeneous nuclear ribonucleoprotein A1</b> | SSGPYGGGGQyFAK<br>PR    | Y11(PTAD) | 3  | ENST00000340913 | 2.75 | 9  |
| <b>Beta-actin</b>                                 | SyELPDGQVITIGNER        | Y2(PTAD)  | 11 | ENST00000331789 | 4.36 | 16 |
| <b>Heterogeneous nuclear ribonucleoprotein K</b>  | TDyNASVSVPDSSGP<br>ER   | Y3(PTAD)  | 2  | ENST00000376281 | 3.21 | 11 |
| <b>Heterogeneous nuclear ribonucleoprotein R</b>  | TGyTLDVTTGQR            | Y3(PTAD)  | 4  | ENST00000374616 | 2.2  | 2  |
| <b>Heat shock cognate 71 kDa protein</b>          | TTPSyVAFTDTER           | Y5(PTAD)  | 8  | ENST00000227378 | 2.54 | 17 |
| <b>Protein disulfide-isomerase</b>                | VDATEESDLAQQyGV<br>R    | Y13(PTAD) | 1  | ENST00000331483 | 3.65 | 13 |
| <b>Endoplasmic reticulum chaperone BiP</b>        | VTHAVVTVPayFNDA<br>QR   | Y11(PTAD) | 1  | ENST00000324460 | 3.12 | 23 |
| <b>14-3-3 protein zeta/delta</b>                  | yLAEVAAGDDKK            | Y1(PTAD)  | 2  | ENST00000395956 | 2    | 4  |
| <b>Large ribosomal subunit protein P2</b>         | yVASYLLAALGGNSS<br>PSAK | Y1(PTAD)  | 1  | ENST00000321153 | 2.29 | 8  |

**Table 2:** List of PTAD-labeled peptides observed in different proteins. (\*) depicts the labeled tyrosine residues.

| <b>Protein</b>     | <b>Peptide</b>           | <b>Precursor</b>           | <b>Theoretical mass (Da)</b> | <b>Observed mass (Da)</b> |
|--------------------|--------------------------|----------------------------|------------------------------|---------------------------|
| Neurotensin+PTAD   | Pyro-LYENKPRRPY*IL       | [M+PTAD+2H] <sup>2+</sup>  | 617.03                       | 617.07                    |
| Neurotensin+2PTAD  | Pyro-LY*ENKPRRPY*IL      | [M+2PTAD+2H] <sup>2+</sup> | 1012.62                      | 1012.62                   |
| Neurotensin+2PTAD  | Pyro-LY*ENKPRRPY*IL      | [M+2PTAD+3H] <sup>3+</sup> | 675.42                       | 675.32                    |
| BSA                | RHPEY*AVSVLLR            | [M+PTAD+3H] <sup>3+</sup>  | 539.28                       | 538.98                    |
| BSA                | HPYFYAPELLY*YANK         | [M+PTAD+3H] <sup>3+</sup>  | 688.70                       | 688.72                    |
| Carbonic anhydrase | MVNNGHFSFNVEY*DDSQDK     | [M+PTAD+3H] <sup>3+</sup>  | 759.11                       | 758.67                    |
| $\beta$ - casein   | DM(ox)PIQAFLLY*QEPVLPVPR | [M+PTAD+2H] <sup>2+</sup>  | 1189.87                      | 1189.43                   |
| Histone H4-Hela    | ISGLIY*EETR              | [M+PTAD+2H] <sup>2+</sup>  | 678.3890                     | 678.33                    |
| Beta actin-Hela    | SY*ELPDGQVITIGNER        | [M+PTAD+2H] <sup>2+</sup>  | 983.5245                     | 984.39                    |
